# Supplementary material for: GFR Variability, Survival, and Cardiovascular Events in Older Adults
Source: PubMed Central journal article supplement — Kidney Med. 2022 Dec 12;5(2):100583. doi: 10.1016/j.xkme.2022.100583 (PMC9922964; doi:10.1016/j.xkme.2022.100583), 2022-12-12
Supplement: mmc1.pdf [file mmc1.pdf]

**Figure S1.** Directed Acyclic Graph

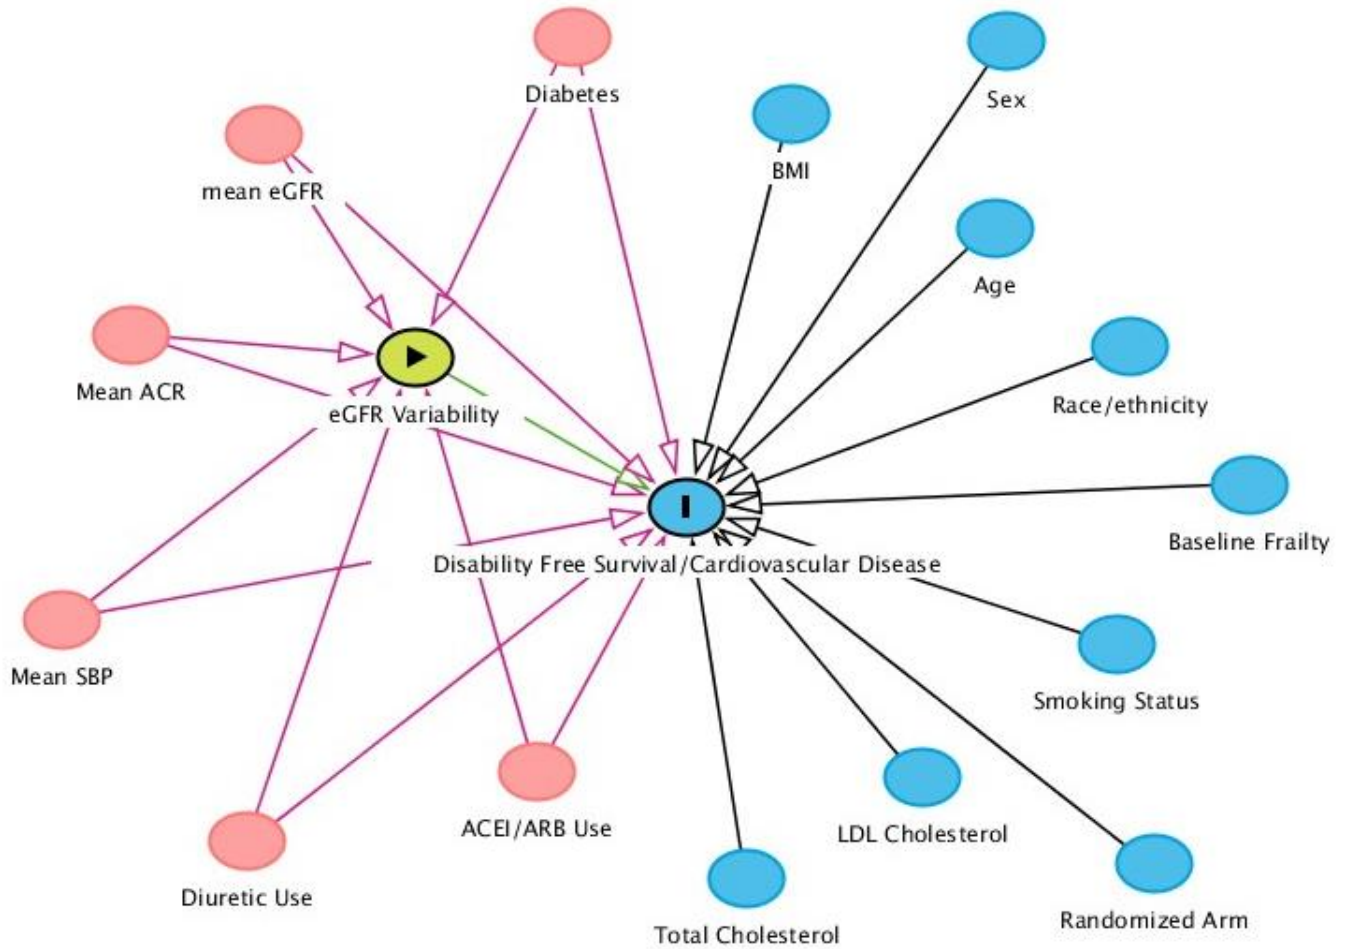

Directed Acyclic Graph representing the hypothesized relation between eGFR variability (exposure of interest), disability free survival (DFS), or cardiovascular disease (CVD) (the two outcomes of interest), and other variables **relating to the exposure and outcome**. ACEI = angiotensin converting enzyme inhibitor; ACR = albumin-to-creatinine ratio; ARB = aldosterone receptor blocker; AV2 = annual visit 2; BL = baseline; BMI = body mass index; DBP = diastolic blood pressure; eGFR = estimated glomerular filtration rate; LDL = low density lipoprotein; SBP = systolic blood pressure. Pink circles mark variables associated with exposure and outcome; blue circles mark variables associated with just outcome and not exposure. Green circle black triangle marks exposure. Blue circle with vertical dash marks outcomes.

**Figure S2.** Hazard ratio (95% CI) for association between eGFR variability and the individual components of disability-free survival, with variability as a continuous variable (per 3 ml/min/1.73 m<sup>2</sup> difference) and according to tertiles (T) of standard deviation

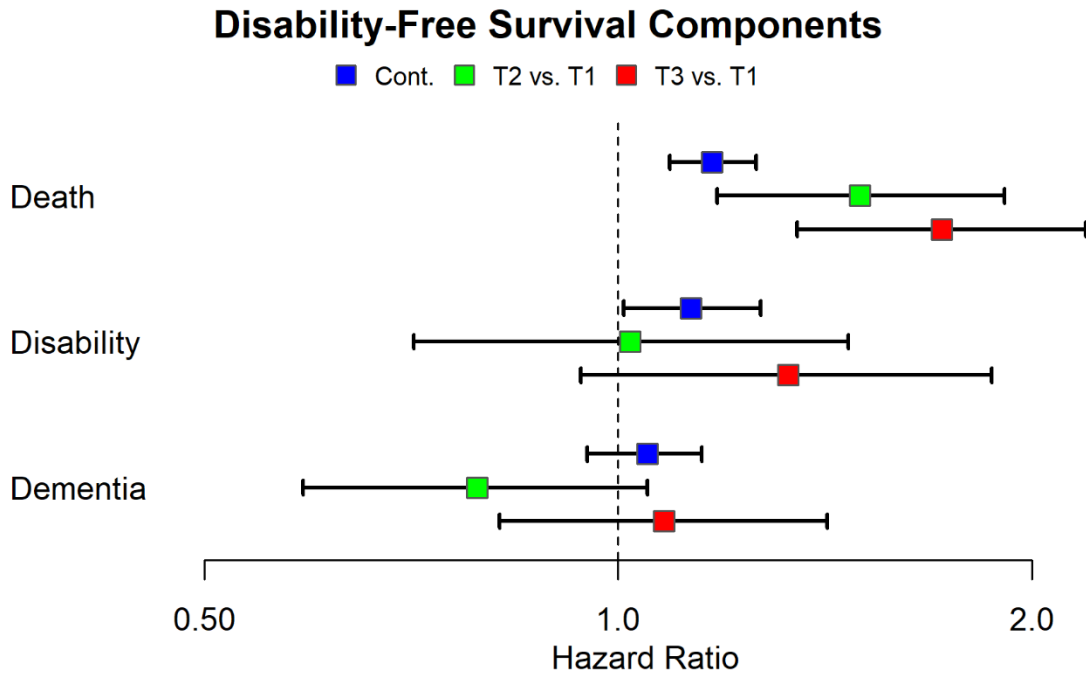

Adjusted for age, sex, race/ethnicity, randomized arm (aspirin versus placebo), BMI, mean eGFR (BL-AV2), mean ACR (BL-AV2), diabetes, baseline frailty, smoking status, total cholesterol, LDL, mean SBP (BL-AV2), ACE/ARB use, diuretic use

**Table S1.** Pearson's correlation coefficients summarizing associations between standard deviation of eGFR and other kidney function variability estimates

| <b>Renal variability estimate</b> | <b>eGFR SD<sup>1</sup></b> |
|-----------------------------------|----------------------------|
| eGFR CV                           | 0.941                      |
| Serum creatinine SD               | 0.766                      |
| Serum creatinine CV               | 0.882                      |
| eGFR SD <sup>2</sup>              | 0.995                      |
| eGFR SD <sup>3</sup>              | 0.915                      |

SD = standard deviation, CV = coefficient of variation

<sup>1</sup>Raw estimate of SD

<sup>2</sup>SD estimate using linear mixed model without a correlation parameter linking within-person mean and SD

<sup>3</sup>SD estimate using linear mixed model, with correlation parameter

**Table S2.** Baseline characteristics of study participants for analysis of CVD events by eGFR variability, with variability according to tertiles of standard deviation

| Variable                                      | Standard deviation of eGFR (eGFR variability) |                 |                 | Overall         |
|-----------------------------------------------|-----------------------------------------------|-----------------|-----------------|-----------------|
|                                               | T1 (0.01-3.07)                                | T2 (3.07-5.85)  | T3 (>5.85)      |                 |
| Number of participants                        | 4151                                          | 4150            | 4151            | 12452           |
| Age (years), mean (SD)                        | 75.1 (4.2)                                    | 75.2 (4.3)      | 75.0 (4.3)      | 75.1 (4.3)      |
| Female, n (%)                                 | 2193 (52.8)                                   | 2198 (53.0)     | 2448 (59.0)     | 6839 (54.9)     |
| Race/Ethnicity, n (%)                         |                                               |                 |                 |                 |
| White                                         | 4017 (96.8)                                   | 4012 (96.7)     | 3915 (94.3)     | 11944 (95.9)    |
| Black                                         | 36 (0.9)                                      | 38 (0.9)        | 138 (3.3)       | 212 (1.7)       |
| Hispanic                                      | 45 (1.1)                                      | 39 (0.9)        | 42 (1.0)        | 126 (1.0)       |
| Asian                                         | 28 (0.7)                                      | 47 (1.1)        | 31 (0.7)        | 106 (0.9)       |
| Other                                         | 25 (0.6)                                      | 14 (0.3)        | 25 (0.6)        | 64 (0.5)        |
| Aspirin treatment assignment, n (%)           | 2045 (49.3)                                   | 2047 (49.3)     | 2101 (50.6)     | 6193 (49.7)     |
| Kidney function (BL-AV2)                      |                                               |                 |                 |                 |
| eGFR (ml/min/1.73 m <sup>2</sup> ), mean (SD) | 74.4 (14.6)                                   | 70.9 (12.9)     | 70.35 (10.8)    | 71.9 (13.0)     |
| ACR (mg/g), median (IQR)                      | 8.0 (5.0, 14.2)                               | 8.0 (5.0, 13.9) | 8.4 (5.3, 15.3) | 8.0 (5.0, 14.5) |
| Serum creatinine (mg/dL), mean (SD)           | 0.9 (0.2)                                     | 0.9 (0.2)       | 0.9 (0.2)       | 0.9 (0.2)       |
| Mean (BL-AV2) SBP, mmHg, mean (SD)            | 138.4 (13.4)                                  | 138.3 (13.6)    | 138.0 (13.8)    | 138.2 (13.6)    |
| Mean (BL-AV2) DBP, mmHg, mean (SD)            | 76.3 (8.0)                                    | 75.9 (8.1)      | 75.5 (8.1)      | 75.9 (8.1)      |
| BMI, n (%)                                    |                                               |                 |                 |                 |
| < 18.5 kg/m <sup>2</sup>                      | 20 (0.5)                                      | 22 (0.5)        | 19 (0.5)        | 61 (0.5)        |
| 18.5-25 kg/m <sup>2</sup>                     | 1119 (27.0)                                   | 1021 (24.6)     | 1024 (24.7)     | 3164 (25.4)     |
| 25-30 kg/m <sup>2</sup>                       | 1884 (45.4)                                   | 1903 (45.9)     | 1846 (44.5)     | 5633 (45.2)     |
| ≥ 30 kg/m <sup>2</sup>                        | 1128 (27.2)                                   | 1204 (29.0)     | 1262 (30.4)     | 3594 (28.9)     |
| Total cholesterol (mg/dL), mean (SD)          | 203.1 (37.3)                                  | 202.9 (37.3)    | 203.3 (38.4)    | 203.1 (37.7)    |
| LDL (mg/dL), mean (SD)                        | 118.7 (33.3)                                  | 118.5 (33.6)    | 118.0 (34.3)    | 118.4 (33.8)    |
| Diabetes, n (%)                               | 383 (9.2)                                     | 405 (9.8)       | 468 (11.3)      | 1256 (10.1)     |
| Baseline frailty, n (%) <sup>1</sup>          |                                               |                 |                 |                 |
| Not frail                                     | 2613 (62.9)                                   | 2623 (63.2)     | 2506 (60.4)     | 7742 (62.2)     |
| Prefrail                                      | 1468 (35.4)                                   | 1465 (35.3)     | 1566 (37.7)     | 4499 (36.1)     |
| Frail                                         | 70 (1.7)                                      | 62 (1.5)        | 79 (1.9)        | 211 (1.7)       |
| Anti-hypertension drug use                    |                                               |                 |                 |                 |
| ACEI/ARBs, n (%)                              |                                               |                 |                 |                 |
| No use at BL or AV1                           | 2320 (55.9)                                   | 2244 (54.1)     | 2047 (49.3)     | 6611 (53.1)     |
| BL or AV1                                     | 102 (2.5)                                     | 131 (3.2)       | 149 (3.6)       | 382 (3.1)       |
| Both BL and AV1                               | 1729 (41.7)                                   | 1775 (42.8)     | 1955 (47.1)     | 5459 (43.8)     |
| Diuretics, n (%)                              |                                               |                 |                 |                 |
| No use at BL or AV1                           | 3363 (81.0)                                   | 3342 (80.5)     | 3176 (76.5)     | 9881 (79.4)     |
| BL or AV1                                     | 70 (1.7)                                      | 72 (1.7)        | 108 (2.6)       | 250 (2.0)       |
| Both BL and AV1                               | 718 (17.3)                                    | 736 (17.7)      | 867 (20.9)      | 2321 (18.6)     |

Abbreviations: SD, standard deviation; IQR, interquartile range; BL, baseline; AV1, first annual visit; AV2, second annual visit; SBP, systolic blood pressure; DBP, diastolic blood pressure; BMI, body mass index; ACEI, angiotensin-converting enzyme inhibitor; ARB, angiotensin receptor blocker; eGFR, estimated glomerular filtration rate

<sup>1</sup>Frailty/pre-frailty : participants were classified as frail if they met at least three of the following criteria and pre-frail if they met one or two of the criteria: (1) BMI < 20 kg/m<sup>2</sup>; (2) lowest 20% of grip strength taking into account gender and BMI; (3) the participant endorsed "I felt that everything I did was an effort" and/or "I could not get going" for three or more days during the last week, according to the Center for Epidemiological Studies-Depression 10 (CES-D10) scale; (4) time to walk 3 meters (10 feet) was in the lowest 20% taking into account gender and height, and (5) no walking outside the home in the last two weeks, or the longest amount of time walking outside without sitting down to rest was less than 10 minutes, according to LIFE Disability questionnaire responses

**Table S3.** Hazard ratio (95% CI) for association between eGFR variability and (A, B) death/dementia/persistent physical disability (DFS) and (C, D) CVD, stratified by baseline CKD status with variability as a continuous variable and according to tertiles (T) of standard deviation.

| Variability Measure                              | Variability<br>(continuous, per 3<br>ml/min/1.73 m <sup>2</sup><br>difference in SD ) | Variability (Tertiles) |                   |                   |
|--------------------------------------------------|---------------------------------------------------------------------------------------|------------------------|-------------------|-------------------|
|                                                  |                                                                                       | T1                     | T2                | T3                |
| <b>A. DFS (No BL CKD), N</b>                     | 9338                                                                                  | 3113                   | 3112              | 3113              |
| Variability Range,<br>ml/min/1.73 m <sup>2</sup> | --                                                                                    | 0.04-3.04              | 3.04-5.80         | 5.80-52.00        |
| Number of events                                 | 535                                                                                   | 170                    | 173               | 192               |
| Event rate per 1000<br>person years              | 21.7                                                                                  | 20.1                   | 21.4              | 23.8              |
| HR (95% CI)                                      |                                                                                       |                        |                   |                   |
| Model 1                                          | 1.06 (0.99, 1.14)                                                                     | REF                    | 1.08 (0.87, 1.33) | 1.21 (0.98, 1.49) |
| Model 2                                          | 1.09 (1.01, 1.17)                                                                     | REF                    | 1.08 (0.87, 1.33) | 1.26 (1.02, 1.55) |
| Model 3                                          | 1.12 (1.04, 1.21)                                                                     | REF                    | 1.20 (0.97, 1.49) | 1.40 (1.12, 1.76) |
| <b>B. DFS (Yes BL CKD), N</b>                    | 2540                                                                                  | 847                    | 846               | 847               |
| Variability Range,<br>ml/min/1.73 m <sup>2</sup> | --                                                                                    | 0.17-3.07              | 3.07-5.79         | 5.80-32.94        |
| Number of events                                 | 219                                                                                   | 56                     | 79                | 84                |
| Event rate per 1000<br>person years              | 32.3                                                                                  | 24.2                   | 35.3              | 37.6              |
| HR (95% CI)                                      |                                                                                       |                        |                   |                   |
| Model 1                                          | 1.13 (1.02, 1.25)                                                                     | REF                    | 1.49 (1.06, 2.10) | 1.58 (1.13, 2.21) |
| Model 2                                          | 1.15 (1.04, 1.27)                                                                     | REF                    | 1.41 (1.00, 1.99) | 1.65 (1.18, 2.32) |
| Model 3                                          | 1.15 (1.03, 1.28)                                                                     | REF                    | 1.44 (1.02, 2.04) | 1.61 (1.14, 2.28) |
| Variability Measure                              | Variability<br>(continuous, per 3<br>ml/min/1.73 m <sup>2</sup><br>difference in SD ) | T1                     | T2                | T3                |
| <b>C. CVD (No BL CKD), N</b>                     | 9268                                                                                  | 3090                   | 3089              | 3089              |
| Variability Range,<br>ml/min/1.73 m <sup>2</sup> | --                                                                                    | 0.04-3.03              | 3.03-5.80         | 5.80-52.00        |
| Number of events                                 | 216                                                                                   | 68                     | 64                | 84                |
| Event rate per 1000<br>person years              | 8.9                                                                                   | 8.2                    | 8.0               | 10.6              |
| HR (95% CI)                                      |                                                                                       |                        |                   |                   |
| Model 1                                          | 1.10 (0.99, 1.22)                                                                     | REF                    | 0.99 (0.70, 1.39) | 1.31 (0.95, 1.81) |
| Model 2                                          | 1.13 (1.02, 1.26)                                                                     | REF                    | 1.00 (0.71, 1.41) | 1.40 (1.01, 1.93) |
| Model 3                                          | 1.14 (1.03, 1.26)                                                                     | REF                    | 1.05 (0.74, 1.49) | 1.51 (1.07, 2.12) |
| <b>D. CVD (Yes BL CKD), N</b>                    | 2525                                                                                  | 842                    | 841               | 842               |
| Variability Range,<br>ml/min/1.73 m <sup>2</sup> | --                                                                                    | 0.17-3.06              | 3.06-5.76         | 5.76-32.94        |
| Number of events                                 | 123                                                                                   | 30                     | 50                | 43                |
| Event rate per 1000<br>person years              | 18.5                                                                                  | 13.2                   | 22.9              | 19.8              |
| HR (95% CI)                                      |                                                                                       |                        |                   |                   |
| Model 1                                          | 1.08 (0.94, 1.24)                                                                     | REF                    | 1.76 (1.12, 2.77) | 1.52 (0.95, 2.42) |
| Model 2                                          | 1.11 (0.96, 1.27)                                                                     | REF                    | 1.69 (1.07, 2.66) | 1.61 (1.01, 2.57) |
| Model 3                                          | 1.09 (0.94, 1.25)                                                                     | REF                    | 1.72 (1.09, 2.71) | 1.54 (0.96, 2.47) |

REF = reference

Model 1: unadjusted

Model 2: adjusted for age, sex, race/ethnicity

Model 3: includes Model 2 adjustments and randomized arm (aspirin versus placebo), BMI, mean eGFR (BL-AV2), mean ACR (BL-AV2), diabetes, baseline frailty, smoking status, total cholesterol, LDL, mean SBP (BL-AV2), ACE/ARB use, diuretic use

Baseline (BL) CKD status determined by eGFR < 60 ml/min/1.73 m<sup>2</sup> or ACR ≥ 3 mg/mmol at year 2 visit *and* baseline or year 1 visit. CKD was defined as "Yes CKD" at AV2, and "Yes CKD" at BL or AV1. Both ACR and eGFR were required to determine CKD, and ACR has higher missingness than eGFR (so the eGFR values used to compute variability were not sufficient to determine CKD status in the same period). Therefore, some participants were excluded on the basis that CKD status could not be determined.

**Table S4.** Hazard ratio (95% CI) for association between eGFR variability and (A,B,C) the individual components of disability-free survival and (D, E, F, G) the individual components of CVD with variability as a continuous variable and according to tertiles (T) of standard deviation

| Variability Measure                 | Variability<br>(continuous, per 3<br>ml/min/1.73 m <sup>2</sup><br>difference in SD) | Variability (Tertiles) |                   |                   |
|-------------------------------------|--------------------------------------------------------------------------------------|------------------------|-------------------|-------------------|
|                                     |                                                                                      | T1                     | T2                | T3                |
| <b>DFS Components</b>               |                                                                                      |                        |                   |                   |
| A. Death, N                         | 12701                                                                                | 4234                   | 4233              | 4234              |
| Variability Range                   | --                                                                                   | 0.01-3.07              | 3.07-5.86         | 5.86-52.00        |
| Number of events                    | 448                                                                                  | 113                    | 162               | 173               |
| Event rate per 1000<br>person years | 13.1                                                                                 | 9.6                    | 14.4              | 15.5              |
| HR (95% CI)                         |                                                                                      |                        |                   |                   |
| Model 1                             | 1.14 (1.06, 1.22)                                                                    | REF                    | 1.53 (1.20, 1.94) | 1.66 (1.31, 2.10) |
| Model 2                             | 1.18 (1.10, 1.27)                                                                    | REF                    | 1.49 (1.17, 1.90) | 1.76 (1.38, 2.23) |
| Model 3                             | 1.17 (1.09, 1.26)                                                                    | REF                    | 1.50 (1.18, 1.91) | 1.72 (1.35, 2.19) |
| B. Physical Disability, N           | 12521                                                                                | 4174                   | 4173              | 4174              |
| Variability Range                   | --                                                                                   | 0.01-3.07              | 3.07-5.85         | 5.85-52.00        |
| Number of events                    | 197                                                                                  | 61                     | 59                | 77                |
| Event rate per 1000<br>person years | 6.0                                                                                  | 5.4                    | 5.4               | 7.2               |
| HR (95% CI)                         |                                                                                      |                        |                   |                   |
| Model 1                             | 1.13 (1.01, 1.26)                                                                    | REF                    | 1.02 (0.72, 1.47) | 1.36 (0.97, 1.90) |
| Model 2                             | 1.15 (1.03, 1.29)                                                                    | REF                    | 1.00 (0.70, 1.43) | 1.38 (0.99, 1.94) |
| Model 3                             | 1.13 (1.01, 1.27)                                                                    | REF                    | 1.02 (0.71, 1.47) | 1.33 (0.94, 1.87) |
| C. Dementia, N                      | 12556                                                                                | 4186                   | 4185              | 4185              |
| Variability Range                   | --                                                                                   | 0.01-3.07              | 3.07-5.86         | 5.86-52.00        |
| Number of events                    | 297                                                                                  | 110                    | 81                | 106               |
| Event rate per 1000<br>person years | 9.0                                                                                  | 9.7                    | 7.5               | 9.9               |
| HR (95% CI)                         |                                                                                      |                        |                   |                   |
| Model 1                             | 1.03 (0.93, 1.13)                                                                    | REF                    | 0.77 (0.58, 1.03) | 1.03 (0.79, 1.35) |
| Model 2                             | 1.04 (0.94, 1.14)                                                                    | REF                    | 0.76 (0.57, 1.01) | 1.06 (0.81, 1.38) |
| Model 3                             | 1.05 (0.95, 1.15)                                                                    | REF                    | 0.79 (0.59, 1.05) | 1.08 (0.82, 1.42) |
| <b>CVD Components</b>               |                                                                                      |                        |                   |                   |
| D. CHD Death, N                     | 12701                                                                                | 4234                   | 4233              | 4234              |
| Variability Range                   | --                                                                                   | 0.01-3.07              | 3.07-5.86         | 5.86-52.00        |
| Number of events                    | 90                                                                                   | 32                     | 29                | 29                |
| Event rate per 1000<br>person years | 2.6                                                                                  | 2.7                    | 2.6               | 2.6               |
| HR (95% CI)                         |                                                                                      |                        |                   |                   |
| Model 1                             | 0.95 (0.78, 1.14)                                                                    | REF                    | 0.97 (0.58, 1.60) | 0.98 (0.59, 1.62) |
| Model 2                             | 0.99 (0.81, 1.20)                                                                    | REF                    | 0.92 (0.56, 1.53) | 1.08 (0.65, 1.80) |
| Model 3                             | 0.98 (0.81, 1.19)                                                                    | REF                    | 0.96 (0.57, 1.59) | 1.08 (0.64, 1.80) |
| E. Non-fatal MI, N                  | 12533                                                                                | 4178                   | 4177              | 4178              |
| Variability Range                   | --                                                                                   | 0.01-3.07              | 3.07-5.85         | 5.85-52.00        |
| Number of events                    | 125                                                                                  | 31                     | 47                | 47                |
| Event rate per 1000<br>person years | 3.8                                                                                  | 2.7                    | 4.3               | 4.4               |
| HR (95% CI)                         |                                                                                      |                        |                   |                   |



|                                  |                   |             |                   |                   |
|----------------------------------|-------------------|-------------|-------------------|-------------------|
| Model 1                          | 1.09 (0.95, 1.26) | REF         | 1.60 (1.01, 2.51) | 1.62 (1.03, 2.55) |
| Model 2                          | 1.14 (0.99, 1.31) | REF         | 1.59 (1.01, 2.50) | 1.75 (1.11, 2.77) |
| Model 3                          | 1.10 (0.95, 1.27) | REF         | 1.47 (0.93, 2.32) | 1.59 (1.01, 2.52) |
| <b>F. Stroke (fatal/non), N</b>  | <b>12554</b>      | <b>4185</b> | <b>4184</b>       | <b>4185</b>       |
| Variability Range                | --                | 0.01-3.07   | 3.07-5.86         | 5.86-52.00        |
| Number of events                 | 163               | 59          | 50                | 54                |
| Event rate per 1000 person years | 4.9               | 5.2         | 4.6               | 5.0               |
| HR (95% CI)                      |                   |             |                   |                   |
| Model 1                          | 1.00 (0.88, 1.14) | REF         | 0.89 (0.61, 1.29) | 0.97 (0.67, 1.40) |
| Model 2                          | 1.00 (0.88, 1.15) | REF         | 0.87 (0.60, 1.27) | 0.98 (0.67, 1.42) |
| Model 3                          | 1.01 (0.89, 1.15) | REF         | 0.89 (0.61, 1.31) | 1.01 (0.69, 1.47) |
| <b>G. Hosp. for HF, N</b>        | <b>12587</b>      | <b>4196</b> | <b>4195</b>       | <b>4196</b>       |
| Variability Range                | --                | 0.01-3.07   | 3.07-5.85         | 5.85-52.00        |
| Number of events                 | 83                | 18          | 26                | 39                |
| Event rate per 1000 person years | 2.5               | 1.6         | 2.4               | 3.6               |
| HR (95% CI)                      |                   |             |                   |                   |
| Model 1                          | 1.23 (1.07, 1.40) | REF         | 1.51 (0.83, 2.76) | 2.31 (1.32, 4.04) |
| Model 2                          | 1.33 (1.14, 1.56) | REF         | 1.46 (0.80, 2.67) | 2.51 (1.43, 4.39) |
| Model 3                          | 1.28 (1.10, 1.50) | REF         | 1.52 (0.83, 2.77) | 2.51 (1.43, 4.43) |

\*A difference of 3 ml/min/1.73 m<sup>2</sup> is approximately the difference between tertile cut-offs, and allows for easier comparison between hazard ratios

REF = reference

Model 1: unadjusted

Model 2: adjusted for age, sex, race/ethnicity

Model 3: includes Model 2 adjustments and randomized arm (aspirin versus placebo), BMI, mean eGFR (BL-AV2), mean ACR (BL-AV2), diabetes, baseline frailty, smoking status, total cholesterol, LDL, mean SBP (BL-AV2), ACE/ARB use, diuretic use

**Table S5.** Hazard ratio (95% CI) for association between eGFR variability and (A) death/dementia/persistent physical disability (DFS) and (B) CVD events, with variability as continuous variable and according to tertiles (T) of standard deviation with inclusion of participants with two or more baseline eGFR values

| Variability Measure              | Variability (continuous, per 3 ml/min/1.73 m <sup>2</sup> difference in SD*) | Variability (Tertiles) |                   |                   |
|----------------------------------|------------------------------------------------------------------------------|------------------------|-------------------|-------------------|
|                                  |                                                                              | T1                     | T2                | T3                |
| A. DFS, N                        | 15199                                                                        | 5066                   | 5066              | 5066              |
| Variability Range                | --                                                                           | 0.00-2.99              | 2.99-5.83         | 5.83-52.00        |
| Number of events                 | 1039                                                                         | 314                    | 344               | 381               |
| Event rate per 1000 person years | 26.3                                                                         | 23.3                   | 26.3              | 29.4              |
| HR (95% CI)                      |                                                                              |                        |                   |                   |
| Model 1                          | 1.08 (1.03, 1.14)                                                            | REF                    | 1.14 (0.98, 1.32) | 1.28 (1.10, 1.48) |
| Model 2                          | 1.10 (1.05, 1.16)                                                            | REF                    | 1.13 (0.97, 1.32) | 1.32 (1.14, 1.53) |
| Model 3                          | 1.08 (1.03, 1.14)                                                            | REF                    | 1.14 (0.98, 1.34) | 1.28 (1.10, 1.49) |
| B. CVD, N                        | 15038                                                                        | 5013                   | 5012              | 5012              |
| Variability Range                | --                                                                           | 0.00-2.98              | 2.98-5.81         | 5.81-52.00        |
| Number of events                 | 463                                                                          | 136                    | 156               | 171               |
| Event rate per 1000 person years | 12.0                                                                         | 10.3                   | 12.2              | 13.5              |
| HR (95% CI)                      |                                                                              |                        |                   |                   |
| Model 1                          | 1.06 (0.99, 1.14)                                                            | REF                    | 1.19 (0.95, 1.50) | 1.32 (1.06, 1.66) |
| Model 2                          | 1.09 (1.01, 1.17)                                                            | REF                    | 1.19 (0.94, 1.49) | 1.39 (1.11, 1.74) |
| Model 3                          | 1.07 (0.99, 1.15)                                                            | REF                    | 1.14 (0.91, 1.44) | 1.33 (1.06, 1.67) |

\*A difference of 3 ml/min/1.73 m<sup>2</sup> is approximately the difference between tertile cut-offs, and allows for easier comparison between hazard ratios

REF = reference

Model 1: unadjusted

Model 2: adjusted for age, sex, race/ethnicity

Model 3: includes Model 2 adjustments and randomized arm (aspirin versus placebo), BMI, mean eGFR (BL-AV2), mean ACR (BL-AV2), diabetes, baseline frailty, smoking status, total cholesterol, LDL, mean SBP (BL-AV2), ACE/ARB use, diuretic use

**Table S6.** Hazard ratio (95% CI) for the association between eGFR variability and (A) death/dementia/persistent physical disability (DFS) and (B) CVD events, with variability as a continuous variable and according to tertiles (T) of coefficient of variation

| Variability Measure              | Variability (continuous, per difference of 3 in CV*) | Variability (Tertiles) |                   |                   |
|----------------------------------|------------------------------------------------------|------------------------|-------------------|-------------------|
|                                  |                                                      | T1                     | T2                | T3                |
| <b>A. DFS, N</b>                 | 12549                                                | 4183                   | 4183              | 4183              |
| Variability Range                | --                                                   | 0.01-4.26              | 4.26-8.52         | 8.52-94.73        |
| Number of events                 | 838                                                  | 250                    | 263               | 325               |
| Event rate per 1000 person years | 25.3                                                 | 22.1                   | 24.0              | 29.8              |
| HR (95% CI)                      |                                                      |                        |                   |                   |
| Model 1                          | 1.08 (1.04, 1.11)                                    | REF                    | 1.09 (0.92, 1.30) | 1.37 (1.16, 1.61) |
| Model 2                          | 1.06 (1.03, 1.10)                                    | REF                    | 1.04 (0.88, 1.24) | 1.25 (1.06, 1.47) |
| Model 3                          | 1.06 (1.03, 1.10)                                    | REF                    | 1.09 (0.91, 1.30) | 1.31 (1.09, 1.56) |
| <b>B. CVD, N</b>                 | 12452                                                | 4151                   | 4150              | 4151              |
| Variability Range                | --                                                   | 0.01-4.24              | 4.25-8.50         | 8.50-94.73        |
| Number of events                 | 379                                                  | 99                     | 132               | 148               |
| Event rate per 1000 person years | 11.7                                                 | 8.9                    | 12.3              | 13.9              |
| HR (95% CI)                      |                                                      |                        |                   |                   |
| Model 1                          | 1.08 (1.03, 1.13)                                    | REF                    | 1.38 (1.07, 1.80) | 1.57 (1.21, 2.02) |
| Model 2                          | 1.07 (1.02, 1.12)                                    | REF                    | 1.34 (1.03, 1.74) | 1.48 (1.15, 1.92) |
| Model 3                          | 1.05 (1.00, 1.11)                                    | REF                    | 1.29 (0.99, 1.69) | 1.40 (1.07, 1.85) |

\*CV is the ratio of SD/mean and therefore is unitless

REF = reference

Model 1: unadjusted

Model 2: adjusted for age, sex, race/ethnicity

Model 3: includes Model 2 adjustments and randomized arm (aspirin versus placebo), BMI, mean eGFR (BL-AV2), mean ACR (BL-AV2), diabetes, baseline frailty, smoking status, total cholesterol, LDL, mean SBP (BL-AV2), ACE/ARB use, diuretic use

**Table S7.** Hazard ratio (95% CI) for the association between serum creatinine variability (standard deviation (A, B) and coefficient of variation (C, D)) and death/dementia/persistent physical disability (DFS) and CVD events, with variability as a continuous variable and according to tertiles (T)

| Variability Measure              | Variability (continuous, per .03 mg/dL difference in SD) | Variability (Tertiles) |                   |                   |
|----------------------------------|----------------------------------------------------------|------------------------|-------------------|-------------------|
|                                  |                                                          | T1                     | T2                | T3                |
| A. DFS (SCr SD), N               | 12549                                                    | 4276                   | 4093              | 4180              |
| Variability Range                | --                                                       | 0-0.04                 | 0.04-0.08         | 0.08-1.66         |
| Number of events                 | 838                                                      | 241                    | 249               | 348               |
| Event rate per 1000 person years | 25.3                                                     | 20.7                   | 23.3              | 32.2              |
| HR (95% CI)                      |                                                          |                        |                   |                   |
| Model 1                          | 1.06 (1.04, 1.07)                                        | REF                    | 1.14 (0.95, 1.36) | 1.59 (1.35, 1.87) |
| Model 2                          | 1.04 (1.02, 1.07)                                        | REF                    | 1.11 (0.93, 1.32) | 1.39 (1.18, 1.64) |
| Model 3                          | 1.05 (1.02, 1.08)                                        | REF                    | 1.09 (0.91, 1.30) | 1.38 (1.16, 1.64) |
| B. CVD (SCr SD), N               | 12452                                                    | 4254                   | 4051              | 4147              |
| Variability Range                | --                                                       | 0-0.04                 | 0.04-0.07         | 0.07-1.66         |
| Number of events                 | 379                                                      | 96                     | 122               | 161               |
| Event rate per 1000 person years | 11.7                                                     | 8.4                    | 11.6              | 15.2              |
| HR (95% CI)                      |                                                          |                        |                   |                   |
| Model 1                          | 1.06 (1.03, 1.09)                                        | REF                    | 1.40 (1.07, 1.83) | 1.85 (1.43, 2.38) |
| Model 2                          | 1.05 (1.01, 1.09)                                        | REF                    | 1.37 (1.04, 1.78) | 1.61 (1.25, 2.08) |
| Model 3                          | 1.03 (0.98, 1.07)                                        | REF                    | 1.35 (1.03, 1.76) | 1.52 (1.17, 1.98) |
| Variability Measure              | Variability (continuous, per difference of 3 in CV*)     | T1                     | T2                | T3                |
| C. DFS (SCr CV), N               | 12549                                                    | 4183                   | 4184              | 4182              |
| Variability Range                | --                                                       | 0-4.86                 | 4.87-8.53         | 8.53-72.1         |
| Number of events                 | 838                                                      | 232                    | 282               | 324               |
| Event rate per 1000 person years | 25.3                                                     | 20.4                   | 25.6              | 30.0              |
| HR (95% CI)                      |                                                          |                        |                   |                   |
| Model 1                          | 1.10 (1.06, 1.13)                                        | REF                    | 1.27 (1.07, 1.51) | 1.50 (1.27, 1.78) |
| Model 2                          | 1.09 (1.05, 1.12)                                        | REF                    | 1.27 (1.06, 1.51) | 1.45 (1.23, 1.72) |
| Model 3                          | 1.07 (1.04, 1.11)                                        | REF                    | 1.25 (1.05, 1.48) | 1.38 (1.16, 1.64) |
| D. CVD (SCr CV), N               | 12452                                                    | 4152                   | 4149              | 4151              |
| Variability Range                | --                                                       | 0-4.85                 | 4.86-8.52         | 8.53-72.1         |
| Number of events                 | 379                                                      | 106                    | 130               | 143               |
| Event rate per 1000 person years | 11.7                                                     | 9.5                    | 12.0              | 13.6              |
| HR (95% CI)                      |                                                          |                        |                   |                   |
| Model 1                          | 1.07 (1.02, 1.13)                                        | REF                    | 1.28 (0.99, 1.65) | 1.45 (1.13, 1.86) |
| Model 2                          | 1.07 (1.02, 1.13)                                        | REF                    | 1.28 (0.99, 1.66) | 1.45 (1.13, 1.87) |
| Model 3                          | 1.06 (1.00, 1.12)                                        | REF                    | 1.27 (0.98, 1.65) | 1.39 (1.08, 1.80) |

\*CV is the ratio of SD/mean and therefore is unitless

REF = reference

Model 1: unadjusted

Model 2: adjusted for age, sex, race/ethnicity

Model 3: includes Model 2 adjustments and randomized arm (aspirin versus placebo), BMI, mean eGFR (BL-AV2),

mean ACR (BL-AV2), diabetes, baseline frailty, smoking status, total cholesterol, LDL, mean SBP (BL-AV2), ACE/ARB use, diuretic use

**Table S8.** Hazard ratio (95% CI) for association between eGFR variability (mixed model two-stage approach) and (A,C) death/dementia/persistent physical disability (DFS) and (C,D) CVD events, with variability as a continuous variable and according to tertiles (T)

| Variability Measure              | Variability (continuous, per 1 ml/min/1.73 m <sup>2</sup> difference in SD) | Variability (Tertiles) |                   |                   |
|----------------------------------|-----------------------------------------------------------------------------|------------------------|-------------------|-------------------|
|                                  |                                                                             | T1                     | T2                | T3                |
| <b>A. DFS (M1), N</b>            | 12549                                                                       | 4183                   | 4183              | 4183              |
| Variability Range                | --                                                                          | 4.08-4.92              | 4.92-5.97         | 5.97-25.50        |
| Number of events                 | 838                                                                         | 246                    | 282               | 310               |
| Event rate per 1000 person years | 25.3                                                                        | 21.6                   | 25.7              | 28.7              |
| HR (95% CI)                      |                                                                             |                        |                   |                   |
| Model 1                          | 1.09 (1.04, 1.14)                                                           | REF                    | 1.20 (1.01, 1.42) | 1.35 (1.14, 1.60) |
| Model 2                          | 1.10 (1.05, 1.16)                                                           | REF                    | 1.16 (0.98, 1.37) | 1.38 (1.16, 1.63) |
| Model 3                          | 1.09 (1.04, 1.15)                                                           | REF                    | 1.18 (0.99, 1.40) | 1.37 (1.15, 1.62) |
| <b>B. CVD (M1), N</b>            | 12452                                                                       | 4151                   | 4150              | 4151              |
| Variability Range                | --                                                                          | 4.08-4.92              | 4.92-5.96         | 5.96-25.50        |
| Number of events                 | 379                                                                         | 107                    | 130               | 142               |
| Event rate per 1000 person years | 11.7                                                                        | 9.6                    | 12.1              | 13.4              |
| HR (95% CI)                      |                                                                             |                        |                   |                   |
| Model 1                          | 1.07 (1.00, 1.15)                                                           | REF                    | 1.27 (0.98, 1.64) | 1.42 (1.10, 1.82) |
| Model 2                          | 1.09 (1.02, 1.17)                                                           | REF                    | 1.23 (0.95, 1.59) | 1.48 (1.15, 1.91) |
| Model 3                          | 1.08 (1.00, 1.16)                                                           | REF                    | 1.18 (0.91, 1.53) | 1.42 (1.10, 1.83) |
| Variability Measure              | Variability (continuous, per 1 ml/min/1.73 m <sup>2</sup> difference in SD) | T1                     | T2                | T3                |
| <b>C. DFS (M2), N</b>            | 12549                                                                       | 4183                   | 4183              | 4183              |
| Variability Range                | --                                                                          | 3.08-4.98              | 4.98-6.17         | 6.17-29.10        |
| Number of events                 | 838                                                                         | 250                    | 253               | 335               |
| Event rate per 1000 person years | 25.3                                                                        | 22.4                   | 23.0              | 30.6              |
| HR (95% CI)                      |                                                                             |                        |                   |                   |
| Model 1                          | 1.11 (1.07, 1.16)                                                           | REF                    | 1.03 (0.86, 1.23) | 1.38 (1.17, 1.63) |
| Model 2                          | 1.07 (1.03, 1.12)                                                           | REF                    | 0.94 (0.79, 1.12) | 1.17 (0.99, 1.38) |
| Model 3                          | 1.10 (1.05, 1.16)                                                           | REF                    | 1.05 (0.87, 1.28) | 1.30 (1.06, 1.59) |
| <b>D. CVD (M2), N</b>            | 12452                                                                       | 4151                   | 4150              | 4151              |
| Variability Range                | --                                                                          | 3.08-4.98              | 4.98-6.16         | 6.17-29.10        |
| Number of events                 | 379                                                                         | 91                     | 130               | 158               |
| Event rate per 1000 person years | 11.7                                                                        | 8.3                    | 12.0              | 14.8              |
| HR (95% CI)                      |                                                                             |                        |                   |                   |
| Model 1                          | 1.12 (1.06, 1.18)                                                           | REF                    | 1.45 (1.11, 1.90) | 1.80 (1.39, 2.32) |
| Model 2                          | 1.10 (1.04, 1.17)                                                           | REF                    | 1.34 (1.02, 1.75) | 1.61 (1.24, 2.09) |
| Model 3                          | 1.08 (1.01, 1.16)                                                           | REF                    | 1.37 (1.02, 1.84) | 1.61 (1.18, 2.19) |

M1: Mixed model without a correlation parameter linking within-person mean and SD

M2: Mixed model with a correlation parameter linking within-person mean and SD

REF = reference

Model 1: unadjusted

Model 2: adjusted for age, sex, race/ethnicity

Model 3: includes Model 2 adjustments and randomized arm (aspirin versus placebo), BMI, mean eGFR (BL-AV2), mean ACR (BL-AV2), diabetes, baseline frailty, smoking status, total cholesterol, LDL, mean SBP (BL-AV2), ACE/ARB use, diuretic use
